# Supplementary material
Source: publisher figshare collection journal article supplement (https://geolsoc.figshare.com/ndownloader/files/25778051)

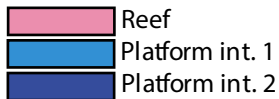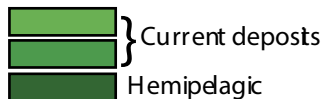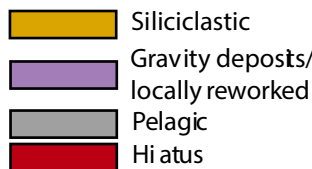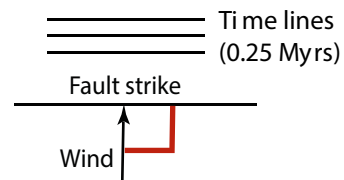

Model Run 21: base model

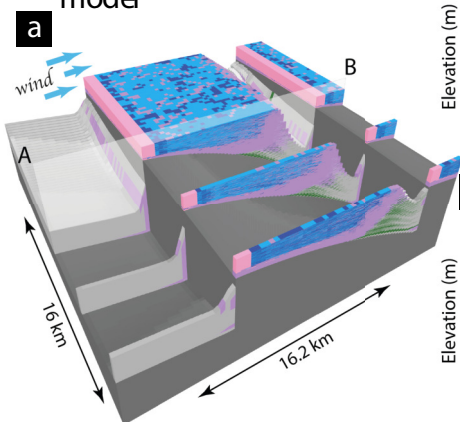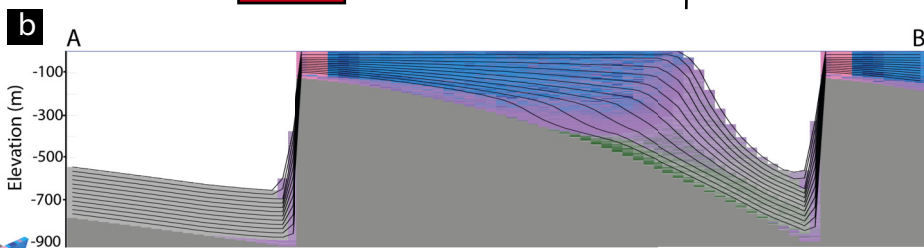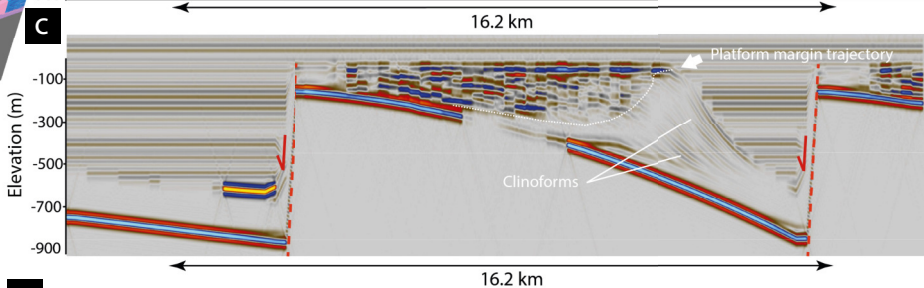

Model Run 22: eustatic control

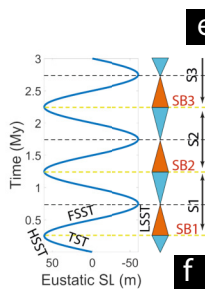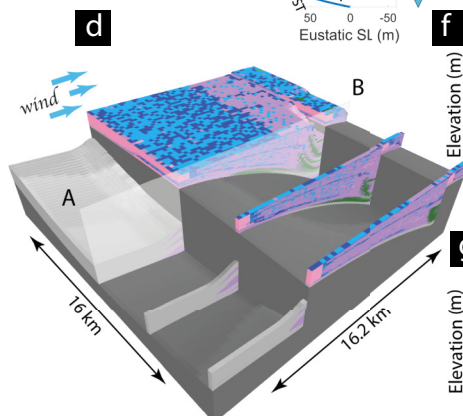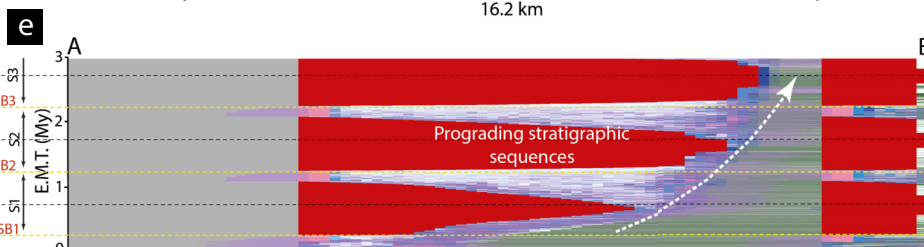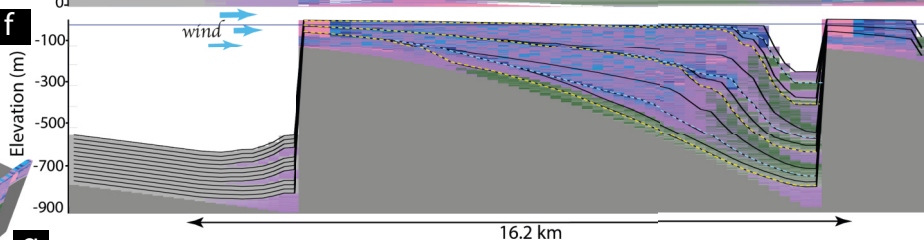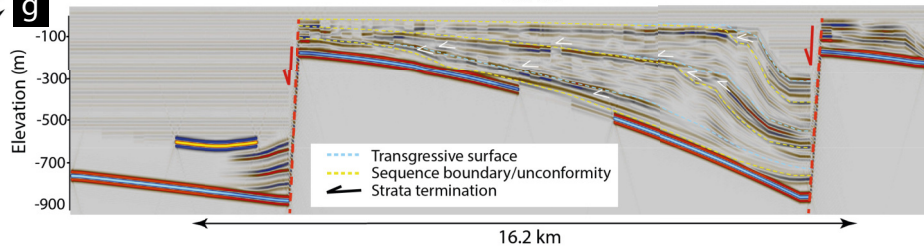

Supplement: Supplementary file 1 [file 25778051]
